# Supplementary material for: A novel model for malaria prediction based on ensemble algorithms
Source: PubMed Central journal article supplement (PMC6932799; doi:10.1371/journal.pone.0226910), 2019-12-26

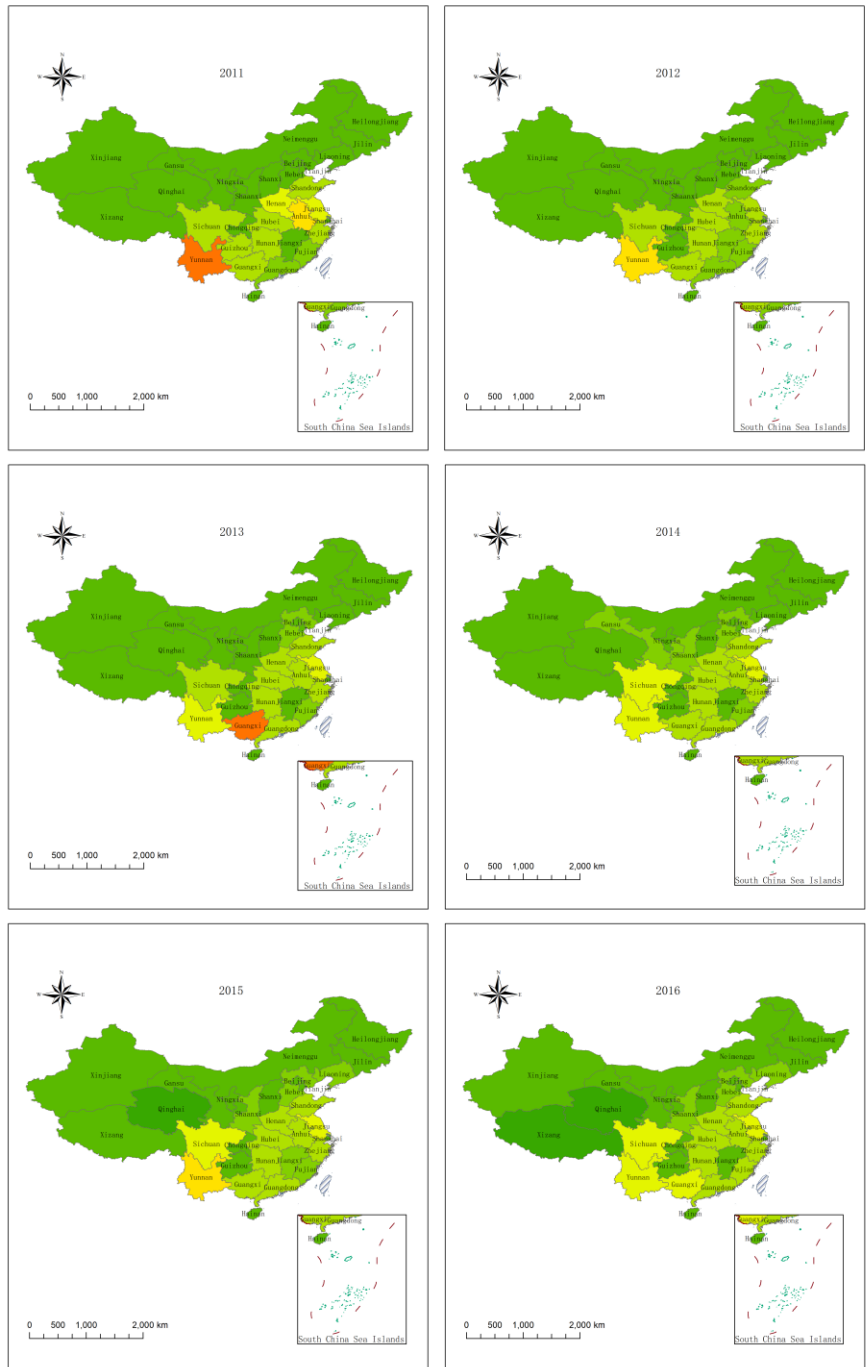

### Graphic Symbols

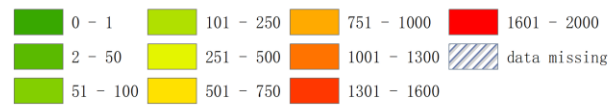

Supplement: pone.0226910.s002.pdf [file pone.0226910.s002.pdf]
